# Supplementary material for: Microplastic pollution in Himalayan lakes: assessment, risks, and sustainable remediation strategies
Source: publisher site journal article supplement (doi:10.3762/bjnano.16.148), 2025-11-25
Supplement: Additional file 1 [file 2190-4286-16-148-S1.pdf]

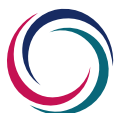

## Supporting Information

for

### **Microplastic pollution in Himalayan lakes: assessment, risks, and sustainable remediation strategies**

Sameeksha Rawat, S. M. Tauseef and Madhuben Sharma

*Beilstein J. Nanotechnol.* **2025**, *16*, 2144–2167. doi:10.3762/bjnano.16.148

## Additional table

**Table S1:** Representative regional and national MP policy measures (modified from [1]).

| Year | Country   | Target                                                        | Policy name                                                                                                         | Category    | Description                                                                                                                                                                                                                 | Reference |
|------|-----------|---------------------------------------------------------------|---------------------------------------------------------------------------------------------------------------------|-------------|-----------------------------------------------------------------------------------------------------------------------------------------------------------------------------------------------------------------------------|-----------|
| 2022 | Canada    | Microfibers                                                   | Environmental Protection Amendment Act (Microfiber Filters for Washing Machines), 2022                              | Regulation  | The Bill amends the Environmental Protection Act to ban selling washing machines without a specified microfiber filter and imposes penalties for non-compliance.                                                            | [2]       |
| 2022 | China     | Microbeads                                                    | Notice on Solidly Promoting Plastic Pollution Control                                                               | Policy      | Lays out responsibilities for ensuring compliance to microbead bans.                                                                                                                                                        | [3]       |
| 2022 | Finland   | General                                                       | Programme of Measures of the Finnish Marine Strategy 2022-2027                                                      | Action Plan | The MSFD program includes measures to reduce MP loads by addressing shipping, marinas, road transport, agriculture, wastewater and urban drainage, and artificial grass, abandoned glass fiber boats, and marine pollution. | [4]       |
| 2022 | France    | Plastic pellets, flakes and powders                           | Decree No. 2021-461 of 16 April 2021 on the prevention of losses of industrial plastic pellets into the environment | Regulation  | Mandates regulations for industrial plastic pellet production, handling, and transport to prevent environmental MP pollution, with regular inspections by certified bodies.                                                 | [5]       |
| 2022 | Spain     | Microbeads; oxo-degradable plastics                           | Law 7/2022, of April 8, on waste and contaminated soil for a circular economy                                       | Regulation  | Prohibits the sale of certain plastic products, including oxodegradable plastic and intentionally added plastic microspheres under 5 mm, following the REACH Regulation.                                                    | [6]       |
| 2021 | Australia | Microbeads; microfibers                                       | National Plastic Plan 2021                                                                                          | Action Plan | A voluntary industry-led phase-out of microbeads in rinse-off personal care, cosmetics and oral hygiene products.                                                                                                           | [7]       |
| 2021 | China     | Microbeads; research; monitoring; recycling; waste management | 14 <sup>th</sup> Five Year Plan Plastic Pollution Control Action Plan                                               | Action Plan | Includes source reduction of plastic pollution (microbead ban), research on MP monitoring and control in water bodies, and measures for recycling and waste management.                                                     | [8]       |
| 2021 | Italy     | Wastewater; PS                                                | Updated Programme of measures according to Article 13 of the MSFD:                                                  | Action Plan | Develops a supply chain for reusable fish boxes and tests prototypes for MP removal WWTPs.                                                                                                                                  | [9]       |
| 2021 | Norway    | Rubber infill                                                 | Chapter 23A of the Regulations relating to pollution control                                                        | Regulation  | In March 2021, Norway introduced regulations for the design and operation of sports pitches using loose MP infill, effective from July 1, 2021.                                                                             | [10]      |

|      |             |                             |                                                                                                    |            |                                                                                                                                                                                                                                                                                                                    |      |
|------|-------------|-----------------------------|----------------------------------------------------------------------------------------------------|------------|--------------------------------------------------------------------------------------------------------------------------------------------------------------------------------------------------------------------------------------------------------------------------------------------------------------------|------|
| 2021 | South Korea | Microbeads                  | Regulation on use of micro-bead                                                                    | Regulation | Ban the use of microbeads in all cleansing agents, detergents and removers manufactured in and outside of South Korea.                                                                                                                                                                                             | [11] |
| 2021 | USA         | Microfibers; wastewater     | Save our Seas 2.0 Act                                                                              | Regulation | The act allows the US Environmental Protection Agency to fund projects aimed at reducing microfiber and MP pollution in drinking water and wastewater treatment.                                                                                                                                                   | [12] |
| 2020 | Argentina   | Microbeads                  | Law27602                                                                                           | Regulation | Bans the production, import and sale of cosmetic products and dental hygiene products for containing intentionally added plastic microbeads.                                                                                                                                                                       | [13] |
| 2020 | China       | Microbeads                  | Opinions on Further Strengthening the Control of Plastic Pollution                                 | Regulation | Prohibit the production of daily chemical products containing microbeads by the end of 2020 and in cleaning products by the end of 2022.                                                                                                                                                                           | [14] |
| 2020 | France      | Microfibers                 | Law No. 2020-105 of February 10, 2020 relating to the fight against waste and the circular economy | Regulation | From January 1, 2025, all new washing machines must have a plastic microfiber filter or an equivalent solution. A decree outlines implementation detail. The government was required to report to Parliament by December 31, 2022, on microfiber emissions, industry constraints and voluntary reduction measures. | [15] |
| 2020 | Thailand    | Microbeads                  | Plastic Management Plan B.E. 2561-2573                                                             | Regulation | Ban on the use of plastic microbeads in the import, production and sale of cosmetics.                                                                                                                                                                                                                              | [16] |
| 2019 | Ireland     | Microbeads                  | Microbeads (Prohibition) Act 2019                                                                  | Regulation | Ban on production and sale of rinse-off cosmetics and household and cleaning products with plastic microbeads.                                                                                                                                                                                                     | [17] |
| 2019 | Peru        | PS; oxo-degradable plastics | Law N°30884 “Law that Regulates Single-Use Plastic and Disposable Containers or Containers”        | Regulation | The law prohibits single-use plastic items, including bags, straws, and expanded PS food containers, as well as plastics with additives that cause MP contamination or contain hazardous, non-recyclable substances.                                                                                               | [18] |
| 2018 | Germany     | Microbeads                  | Ban of microplastics in soaps, creams, toothpastes                                                 | Regulation | As of January 1, 2020, the law bans the sale of rinse-off cosmetic products with exfoliating or cleansing MPs, with penalties ranging from fines to production halts.                                                                                                                                              | [19] |
| 2018 | Italy       | Microbeads                  | General Budget Law 2018: Law no. 205 of 27, Art. 1, Sections 543 to 548, December 2017             | Regulation | Ban on the production and marketing of rinse-off cosmetics products (including soaps, creams and toothpastes) containing MPs.                                                                                                                                                                                      | [20] |

|      |                           |                                     |                                                                                                                           |            |                                                                                                                                                                                                                                                                                                                                                                                          |      |
|------|---------------------------|-------------------------------------|---------------------------------------------------------------------------------------------------------------------------|------------|------------------------------------------------------------------------------------------------------------------------------------------------------------------------------------------------------------------------------------------------------------------------------------------------------------------------------------------------------------------------------------------|------|
| 2018 | Sweden                    | General                             | Regulation (2018: 496) on state subsidies to reduce emissions of microplastics to the aquatic environment                 | Regulation | Public support for investments in technology and measures to clean surface water from MPs and other contaminants, along with feasibility studies and preparatory measures.                                                                                                                                                                                                               | [21] |
| 2018 | Sweden                    | Microbeads; oxo-degradable plastics | Prohibition in Certain Cases in Connection with the Handling, Import and Export of Chemical Products Ordinance (1998:944) | Regulation | Ban on the import and manufacture of microbeads in rinse-off cosmetics (2018), sale of microbeads in rinse-off cosmetics (2019), and oxo-degradable plastics (2021).                                                                                                                                                                                                                     | [22] |
| 2018 | The Netherlands           | General                             | Dutch Policy Programme on Microplastics                                                                                   | Strategy   | The programme aims to ban intentional MP additives at the European level, reduce emissions from plastic litter degradation, minimize MP release from wear and tear of products (e.g., tires, paint, clothing), and enhance research on their effects on human health.                                                                                                                    | [23] |
| 2018 | United Kingdom (Scotland) | Microbeads                          | The Environmental Protection (Microbeads) (Scotland) Regulations 2018                                                     | Regulation | Ban on the manufacture and supply of rinse-off PCPs containing microbeads.                                                                                                                                                                                                                                                                                                               | [24] |
| 2018 | United Kingdom (Wales)    | Microbeads                          | Environmental Protection (Microbeads) (Wales) Regulations 2018 (S.I. No. 760 (W. 151) of 2018)                            | Regulation | Ban on the manufacture and supply of rinse-off PCPs containing microbeads.                                                                                                                                                                                                                                                                                                               | [25] |
| 2018 | USA (California)          | General                             | SB 1422: California Safe Drinking Water Act                                                                               | Policy     | Decision to determine MPs in drinking water, start a monitoring project, and provide information to constituents.                                                                                                                                                                                                                                                                        | [26] |
| 2018 | USA (California)          | General                             | SB 1263: Microplastic Materials                                                                                           | Policy     | Decision and description of how to develop a statewide MPs strategy.                                                                                                                                                                                                                                                                                                                     | [27] |
| 2018 | USA (California)          | General                             | California Ocean Litter Prevention Strategy                                                                               | Strategy   | The strategy focuses on understanding the scale and impact of MPs and microfibers in marine environments and developing solutions to mitigate them. Key objectives include conducting comprehensive characterization of MPs and macro-debris (Objective 4.1) and quantifying MP pathways within watersheds while developing technological solutions for their reduction (Objective 4.2). | [28] |

|      |                          |            |                                                                                                                         |            |                                                                                                                                                                                                                                                                        |      |
|------|--------------------------|------------|-------------------------------------------------------------------------------------------------------------------------|------------|------------------------------------------------------------------------------------------------------------------------------------------------------------------------------------------------------------------------------------------------------------------------|------|
| 2017 | Canada                   | Microbeads | Microbeads in Toiletries Regulations (SOR/2017-111)                                                                     | Regulation | The regulation bans the manufacture, import, and sale of exfoliating or cleansing toiletries containing plastic microbeads, including non-prescription drugs and natural health products, with a phased ban starting January 1, 2018, and a complete ban by July 2019. | [29] |
| 2017 | China (Taiwan)           | Microbeads | Restrictions on the Manufacture, Import, and Sale of Personal Care and Cosmetics Products Containing Plastic Microbeads | Regulation | Ban on import, manufacture and sale of microbeads in rinse-off cosmetics                                                                                                                                                                                               | [30] |
| 2017 | New Zealand              | Microbeads | Waste Minimization (Microbeads) Regulations 2017, under section 23(1) (b) of the Waste Minimization Act 2008            | Regulation | Ban on import, manufacture, and sale of wash-off products containing microbeads for exfoliation, body cleaning, abrasive cleaning, or virtual appearance, excluding medical devices or medicines                                                                       | [31] |
| 2017 | South Korea              | Microbeads | Regulations on safety standards for cosmetics [Annex 1] {No. 2017-114, Notice, Article 3, Dec, 29, 2017                 | Regulation | Ban on sale all cosmetic products containing MPs under 5 mm                                                                                                                                                                                                            | [32] |
| 2017 | United Kingdom (England) | Microbeads | The Environmental Protection (Microbeads) (England) Regulations 2017                                                    | Regulation | Ban on the manufacture and supply of rinse-off PCPs containing microbeads                                                                                                                                                                                              | [33] |
| 2016 | France                   | Microbeads | Reclaiming Biodiversity, Nature and Landscapes Act No 2016-1087 of 8, Article 124, August 2016                          | Regulation | Bans the sale of rinse-off cosmetic products with plastic microbeads for exfoliation or cleaning from 2018                                                                                                                                                             | [34] |
| 2015 | Canada (Ontario)         | Microbeads | Bill 75 Microbead Elimination and Monitoring Act (2015)                                                                 | Regulation | Prohibits the manufacture and addition of microbeads in cosmetics, soaps, and similar products                                                                                                                                                                         | [35] |
| 2015 | USA                      | Microbeads | Microbead-Free Waters Act                                                                                               | Regulation | Prohibits the sale and distribution of rinse-off cosmetics with plastic microbeads. Manufacturing banned from July 2017, interstate delivery prohibited by 2018, with a one-year delay for non-prescription drugs                                                      | [36] |

|      |                |                                                               |                                                                                                                         |             |                                                                                                                                                                                                                                                                                                                    |      |
|------|----------------|---------------------------------------------------------------|-------------------------------------------------------------------------------------------------------------------------|-------------|--------------------------------------------------------------------------------------------------------------------------------------------------------------------------------------------------------------------------------------------------------------------------------------------------------------------|------|
| 2022 | China          | Microbeads                                                    | Notice on Solidly Promoting Plastic Pollution Control                                                                   | Policy      | Lays out responsibilities for ensuring compliance to microbead bans.                                                                                                                                                                                                                                               | [3]  |
| 2021 | China          | Microbeads; research; monitoring; recycling; waste management | 14 <sup>th</sup> Five Year Plan Plastic Pollution Control Action Plan                                                   | Action Plan | Includes source reduction of plastic pollution (microbead ban), research on MP monitoring and control in water bodies, and measures for recycling and waste management.                                                                                                                                            | [37] |
| 2021 | South Korea    | Microbeads                                                    | Regulation on use of micro-bead                                                                                         | Regulation  | Ban the use of microbeads in all cleansing agents, detergents and removers manufactured in and outside of South Korea.                                                                                                                                                                                             | [38] |
| 2020 | China          | Microbeads                                                    | Opinions on Further Strengthening the Control of Plastic Pollution                                                      | Regulation  | Prohibit the production of daily chemical products containing microbeads by the end of 2020 and in cleaning products by the end of 2022.                                                                                                                                                                           | [39] |
| 2017 | China (Taiwan) | Microbeads                                                    | Restrictions on the Manufacture, Import, and Sale of Personal Care and Cosmetics Products Containing Plastic Microbeads | Regulation  | Ban on import, manufacture and sale of microbeads in rinse-off cosmetics                                                                                                                                                                                                                                           | [40] |
| 2017 | South Korea    | Microbeads                                                    | Regulations on safety standards for cosmetics [Annex 1] {No. 2017-114, Notice, Article 3, Dec, 29, 2017                 | Regulation  | Ban on sale all cosmetic products containing MPs under 5 mm                                                                                                                                                                                                                                                        | [41] |
| 2022 | France         | Plastic pellets, flakes and powders                           | Decree No. 2021-461 of 16 April 2021 on the prevention of losses of industrial plastic pellets into the environment     | Regulation  | Mandates regulations for industrial plastic pellet production, handling, and transport to prevent environmental MP pollution, with regular inspections by certified bodies.                                                                                                                                        | [42] |
| 2020 | France         | Microfibers                                                   | Law No. 2020-105 of February 10, 2020 relating to the fight against waste and the circular economy                      | Regulation  | From January 1, 2025, all new washing machines must have a plastic microfiber filter or an equivalent solution. A decree outlines implementation detail. The government was required to report to Parliament by December 31, 2022, on microfiber emissions, industry constraints and voluntary reduction measures. | [43] |

|      |                           |                         |                                                                                                |             |                                                                                                                                                                                                                                                                                                                                                                                          |      |
|------|---------------------------|-------------------------|------------------------------------------------------------------------------------------------|-------------|------------------------------------------------------------------------------------------------------------------------------------------------------------------------------------------------------------------------------------------------------------------------------------------------------------------------------------------------------------------------------------------|------|
| 2018 | Germany                   | Microbeads              | Ban of microplastics in soaps, creams, toothpastes                                             | Regulation  | As of January 1, 2020, the law bans the sale of rinse-off cosmetic products with exfoliating or cleansing MPs, with penalties ranging from fines to production halts.                                                                                                                                                                                                                    | [44] |
| 2018 | United Kingdom (Scotland) | Microbeads              | The Environmental Protection (Microbeads) (Scotland) Regulations 2018                          | Regulation  | Ban on the manufacture and supply of rinse-off PCPs containing microbeads.                                                                                                                                                                                                                                                                                                               | [45] |
| 2016 | France                    | Microbeads              | Reclaiming Biodiversity, Nature and Landscapes Act No 2016-1087 of 8, Article 124, August 2016 | Regulation  | Bans the sale of rinse-off cosmetic products with plastic microbeads for exfoliation or cleaning from 2018                                                                                                                                                                                                                                                                               | [46] |
| 2018 | USA (California)          | General                 | SB 1422: California Safe Drinking Water Act                                                    | Policy      | Decision to determine MPs in drinking water, start a monitoring project, and provide information to constituents.                                                                                                                                                                                                                                                                        | [47] |
| 2018 | USA (California)          | General                 | SB 1263: Microplastic Materials                                                                | Policy      | Decision and description of how to develop a statewide MPs strategy.                                                                                                                                                                                                                                                                                                                     | [48] |
| 2018 | USA (California)          | General                 | California Ocean Litter Prevention Strategy                                                    | Strategy    | The strategy focuses on understanding the scale and impact of MPs and microfibers in marine environments and developing solutions to mitigate them. Key objectives include conducting comprehensive characterization of MPs and macro-debris (Objective 4.1) and quantifying MP pathways within watersheds while developing technological solutions for their reduction (Objective 4.2). | [49] |
| 2017 | Canada                    | Microbeads              | Microbeads in Toiletries Regulations (SOR/2017-111)                                            | Regulation  | The regulation bans the manufacture, import, and sale of exfoliating or cleansing toiletries containing plastic microbeads, including non-prescription drugs and natural health products, with a phased ban starting January 1, 2018, and a complete ban by July 2019.                                                                                                                   | [50] |
| 2015 | Canada (Ontario)          | Microbeads              | Bill 75 Microbead Elimination and Monitoring Act (2015)                                        | Regulation  | Prohibits the manufacture and addition of microbeads in cosmetics, soaps, and similar products                                                                                                                                                                                                                                                                                           | [51] |
| 2021 | Australia                 | Microbeads; microfibers | National Plastic Plan 2021                                                                     | Action Plan | A voluntary industry-led phase-out of microbeads in rinse-off personal care, cosmetics and oral hygiene products.                                                                                                                                                                                                                                                                        | [52] |

|      |           |            |                                        |            |                                                                                                                                              |      |
|------|-----------|------------|----------------------------------------|------------|----------------------------------------------------------------------------------------------------------------------------------------------|------|
| 2020 | Argentina | Microbeads | Law27602                               | Regulation | Bans the production, import and sale of cosmetic products and dental hygiene products for containing intentionally added plastic microbeads. | [53] |
| 2020 | Thailand  | Microbeads | Plastic Management Plan B.E. 2561-2573 | Regulation | Ban on the use of plastic microbeads in the import, production and sale of cosmetics.                                                        | [54] |

## References

1. Rognerud, I.; Hurley, R.; Lusher, A.; Nerland Bråte, I. L.; Hovland Steindal, E. *Addressing microplastics in a global agreement on plastic pollution*. Nordic Council of Ministers. **2023**. doi:10.6027/temanord2022-566
2. An Act to Amend the Environmental Protection Act with Respect to Microfiber Filters for Washing Machines (2022). <https://www.ola.org/en/legislative-business/bills/parliament-42/session-2/bill-102>
3. Notice on Solidly Promoting Plastic Pollution Control (2020). [https://www.mee.gov.cn/xxgk2018/xxgk/xxgk10/202007/t20200717\\_789638.html](https://www.mee.gov.cn/xxgk2018/xxgk/xxgk10/202007/t20200717_789638.html)
4. [https://julkaisut.valtioneuvosto.fi/bitstream/handle/10024/163705/YM\\_2021\\_31.pdf?sequence=1&isAllowed=y](https://julkaisut.valtioneuvosto.fi/bitstream/handle/10024/163705/YM_2021_31.pdf?sequence=1&isAllowed=y)
5. <https://www.legifrance.gouv.fr/jorf/id/JORFTEXT000043388114>
6. <https://www.boe.es/buscar/act.php?id=BOE-A-2022-5809>
7. <https://www.agriculture.gov.au/sites/default/files/documents/national-plastics-plan-2021.pdf>
8. [https://www.mee.gov.cn/xxgk2018/xxgk/xxgk10/202109/t20210916\\_945621.html](https://www.mee.gov.cn/xxgk2018/xxgk/xxgk10/202109/t20210916_945621.html)
9. [https://g20mpl.org/wp-content/uploads/2022/08/G20MPL-report-2022\\_2nd-edition\\_1108.pdf](https://g20mpl.org/wp-content/uploads/2022/08/G20MPL-report-2022_2nd-edition_1108.pdf)
10. <https://www.miljodirektoratet.no/ansvarsomrader/avfall/avfallstyper/gummigranulat-fra-kunstgressbaner/>
11. <https://g20mpl.org/partners/republicofkorea>
12. <https://www.congress.gov/bill/116th-congress/senate-bill/1982/text>
13. <https://www.argentina.gob.ar/normativa/nacional/ley-27602-345720>
14. [https://www.ndrc.gov.cn/xxgk/zcfb/tz/202001/t20200119\\_1219275.html?code=&state=123](https://www.ndrc.gov.cn/xxgk/zcfb/tz/202001/t20200119_1219275.html?code=&state=123)
15. <https://www.legifrance.gouv.fr/jorf/id/JORFTEXT000043956924>
16. <https://g20mpl.org/partners/thailand>
17. <https://www.irishstatutebook.ie/eli/2019/act/52/enacted/en/print>
18. [https://g20mpl.org/wp-content/uploads/2022/08/G20MPL-report-2022\\_2nd-edition\\_1108.pdf](https://g20mpl.org/wp-content/uploads/2022/08/G20MPL-report-2022_2nd-edition_1108.pdf)
19. [https://g20mpl.org/wp-content/uploads/2022/08/G20MPL-report-2022\\_2nd-edition\\_1108.pdf](https://g20mpl.org/wp-content/uploads/2022/08/G20MPL-report-2022_2nd-edition_1108.pdf)
20. <http://www.normattiva.it/eli/id/2017/12/29/17G00222/CONSOLIDATED/20221222>
21. <http://www.fao.org/faolex/results/details/en/c/LEX-FAOC187073>

22. [http://www.riksdagen.se/sv/dokument-lagar/dokument/svensk-forfattningssamling/forordning-1998944-om-forbud-mm-i-vissa-fall\\_sfs-1998-944](http://www.riksdagen.se/sv/dokument-lagar/dokument/svensk-forfattningssamling/forordning-1998944-om-forbud-mm-i-vissa-fall_sfs-1998-944)
23. <https://www.tweedekamer.nl/downloads/document?id=2021D25682>
24. <https://nicholasinstitute.duke.edu/plastics-policies/environmental-protection-microbeads-scotland-regulations-2018>
25. <https://nicholasinstitute.duke.edu/plastics-policies/environmental-protection-microbeads-wales-regulations-2018-si-no-760-w-151-2018>
26. [https://leginfo.legislature.ca.gov/faces/codes\\_displaySection.xhtml?sectionNum=116376.&lawCode=HSC](https://leginfo.legislature.ca.gov/faces/codes_displaySection.xhtml?sectionNum=116376.&lawCode=HSC)
27. [https://leginfo.legislature.ca.gov/faces/billTextClient.xhtml?bill\\_id=201720180SB1263](https://leginfo.legislature.ca.gov/faces/billTextClient.xhtml?bill_id=201720180SB1263)
28. [http://www.opc.ca.gov/webmaster/\\_media\\_library/2018/06/2018\\_CA\\_OceanLitterStrategy.pdf](http://www.opc.ca.gov/webmaster/_media_library/2018/06/2018_CA_OceanLitterStrategy.pdf)
29. <https://nicholasinstitute.duke.edu/plastics-policies/microbeads-toiletries-regulations-sor2017-111>
30. <https://nicholasinstitute.duke.edu/plastics-policies/restrictions-manufacture-import-and-sale-personal-care-and-cosmetics-products>
31. <https://nicholasinstitute.duke.edu/plastics-policies/waste-minimisation-microbeads-regulations-2017>
32. <https://g20mpl.org/partners/republicofkorea>
33. <https://nicholasinstitute.duke.edu/plastics-policies/environmental-protection-microbeads-england-regulations-2017>
34. <https://nicholasinstitute.duke.edu/plastics-policies/article-124-law-8-august-2016-reconquest-biodiversity-nature-and-landscapes>
35. <https://www.ola.org/en/legislative-business/bills/parliament-41/session-1/bill-75>
36. <https://www.congress.gov/114/plaws/publ114/PLAW-114publ114.pdf>
37. [https://www.mee.gov.cn/xxgk2018/xxgk/xxgk10/202109/t20210916\\_945621.html](https://www.mee.gov.cn/xxgk2018/xxgk/xxgk10/202109/t20210916_945621.html)
38. <https://g20mpl.org/partners/republicofkorea>
39. [https://www.ndrc.gov.cn/xxgk/zcfb/tz/202001/t20200119\\_1219275.html?code=&state=123](https://www.ndrc.gov.cn/xxgk/zcfb/tz/202001/t20200119_1219275.html?code=&state=123)
40. <https://nicholasinstitute.duke.edu/plastics-policies/restrictions-manufacture-import-and-sale-personal-care-and-cosmetics-products>
41. <https://g20mpl.org/partners/republicofkorea>
42. <https://www.legifrance.gouv.fr/jorf/id/JORFTEXT000043388114>
43. <https://www.legifrance.gouv.fr/jorf/id/JORFTEXT000043956924>
44. [https://g20mpl.org/wp-content/uploads/2022/08/G20MPL-report-2022\\_2nd-edition\\_1108.pdf](https://g20mpl.org/wp-content/uploads/2022/08/G20MPL-report-2022_2nd-edition_1108.pdf)
45. <https://nicholasinstitute.duke.edu/plastics-policies/environmental-protection-microbeads-scotland-regulations-2018>
46. <https://nicholasinstitute.duke.edu/plastics-policies/article-124-law-8-august-2016-reconquest-biodiversity-nature-and-landscapes>
47. [https://leginfo.legislature.ca.gov/faces/codes\\_displaySection.xhtml?sectionNum=116376.&lawCode=HSC](https://leginfo.legislature.ca.gov/faces/codes_displaySection.xhtml?sectionNum=116376.&lawCode=HSC)
48. [https://leginfo.legislature.ca.gov/faces/billTextClient.xhtml?bill\\_id=201720180SB1263](https://leginfo.legislature.ca.gov/faces/billTextClient.xhtml?bill_id=201720180SB1263)
49. [http://www.opc.ca.gov/webmaster/\\_media\\_library/2018/06/2018\\_CA\\_OceanLitterStrategy.pdf](http://www.opc.ca.gov/webmaster/_media_library/2018/06/2018_CA_OceanLitterStrategy.pdf)
50. <https://nicholasinstitute.duke.edu/plastics-policies/microbeads-toiletries-regulations-sor2017-111>
51. <https://www.ola.org/en/legislative-business/bills/parliament-41/session-1/bill-75>
52. <https://www.agriculture.gov.au/sites/default/files/documents/national-plastics-plan-2021.pdf>
53. <https://www.argentina.gob.ar/normativa/nacional/ley-27602-345720>
54. <https://g20mpl.org/partners/thailand>
